# Supplementary material
Source: Springer Nature journal article supplement (https://www.springermedizin.de/resource/supplementary/12913_2012_2371_MOESM5_ESM.pdf/9530514)

**Figure 4: Training undertaken VS further training required for MDT coordinators.**

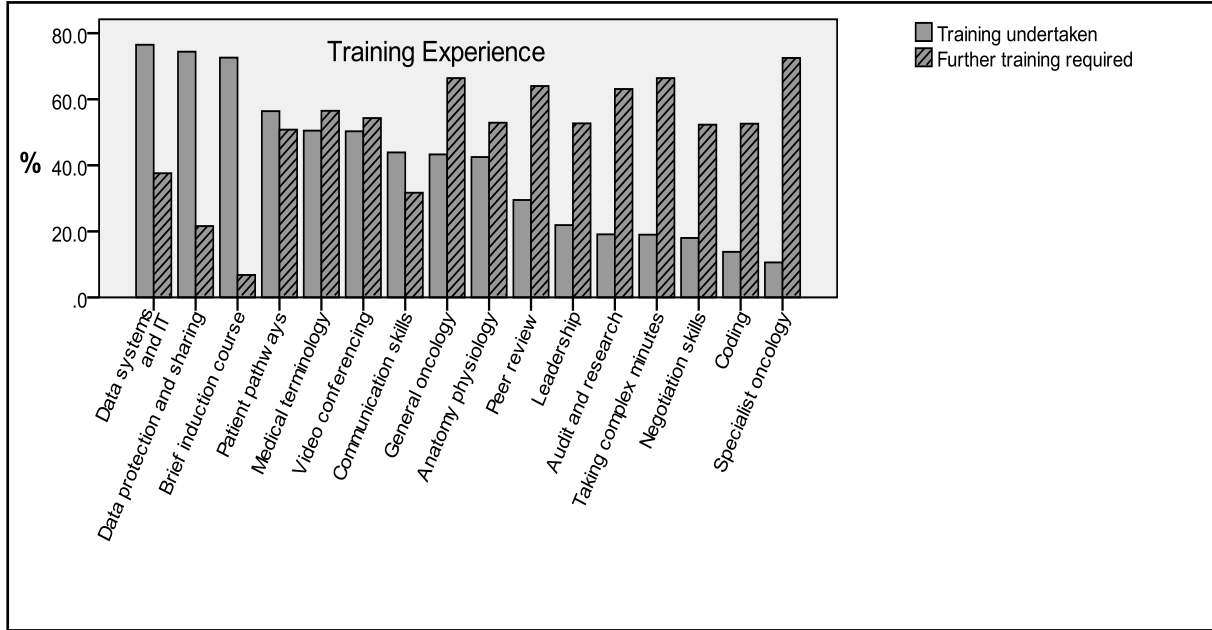

Supplement: MOESM5 [file 9530514]
